# Supplementary material for: Calmodulin fishing with a structurally disordered bait triggers CyaA catalysis
Source: PubMed Central journal article supplement (PMC5764468; doi:10.1371/journal.pbio.2004486), 2017-12-29
Supplement: pbio.2004486.s001.pdf [file pbio.2004486.s001.pdf]

M Q Q S H Q A G Y A N A A D R E S G I P A A V L D G I K A V A K E K N A T L M F R L V N P H S T S L  
5 10 15 20 25 30 35 40 45 50  
I A E G V A T K G L G V H A K S S D W G L Q A G Y I P V N P N L S K L F G R A P E V I A R A D N D V  
55 60 65 70 75 80 85 90 95 100  
N S S L A H G H T A V D L T L S K E R L D Y L R Q A G L V T G M A D G V V A S N H A G Y E Q F E F R  
105 110 115 120 125 130 135 140 145 150  
V K E T S D G R Y A V Q Y R R K G G D D F E A V K V I G N A A G I P L T A D I D M F A I M P H L S N  
155 160 165 170 175 180 185 190 195 200  
F R D S A R S S V T S G D S V T D Y L A R T R R A A S E A T G G L D R E R I D L L W K I A R A G A R  
205 210 215 220 225 230 235 240 245 250  
S A V G T E A R R Q F R Y D G D M N I G V I T D F E L E V R N A L N R R A H A V G A Q D V V Q H G T  
255 260 265 270 275 280 285 290 295 300  
E Q N N P F P E A D E K I F V V S A T G E S Q M L T R G Q L K E Y I G Q Q R G E G Y V F Y E N R A Y  
305 310 315 320 325 330 335 340 345 350  
G V A G K S L F D D G L G A  
355 360

Total: 36 Peptides, 100.0% Coverage, 1.46 Redundancy
