# Supplementary material for: Calmodulin fishing with a structurally disordered bait triggers CyaA catalysis
Source: PubMed Central journal article supplement (PMC5764468; doi:10.1371/journal.pbio.2004486), 2017-12-29
Supplement: pbio.2004486.s003.pdf [file pbio.2004486.s003.pdf]

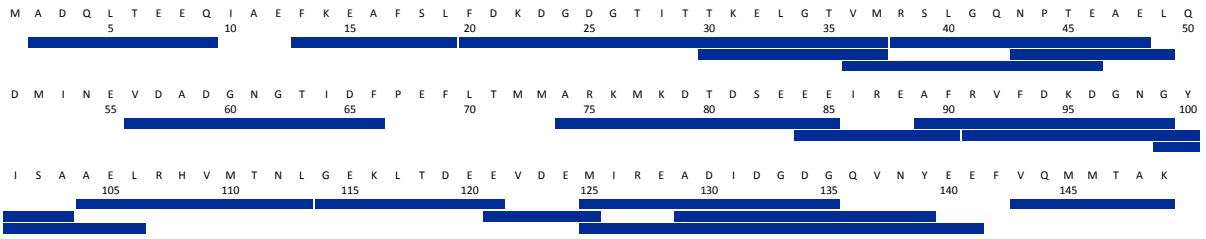

Total: 20 Peptides, 87.9% Coverage, 1.53 Redundancy
