# Supplementary material for: Calmodulin fishing with a structurally disordered bait triggers CyaA catalysis
Source: PubMed Central journal article supplement (PMC5764468; doi:10.1371/journal.pbio.2004486), 2017-12-29

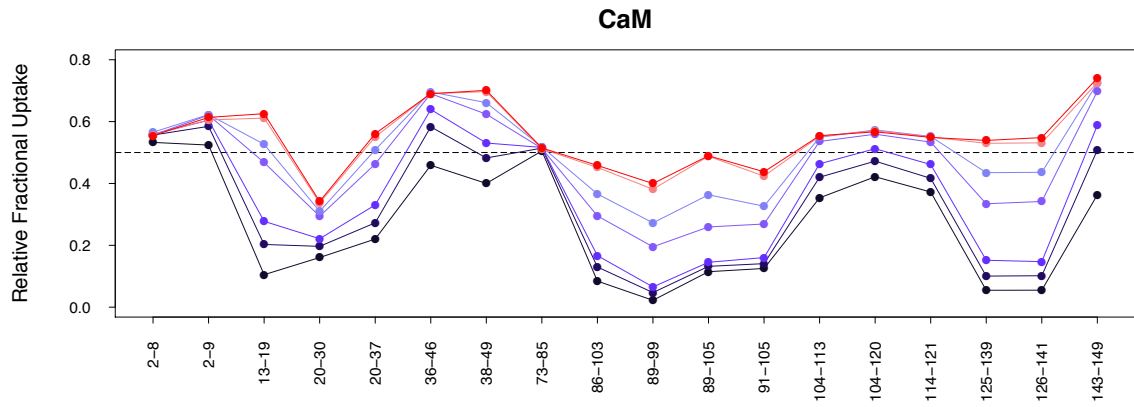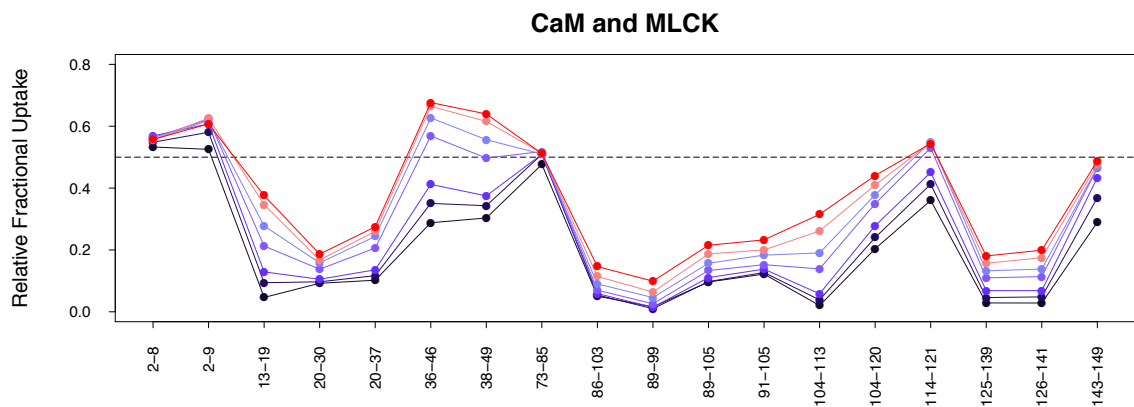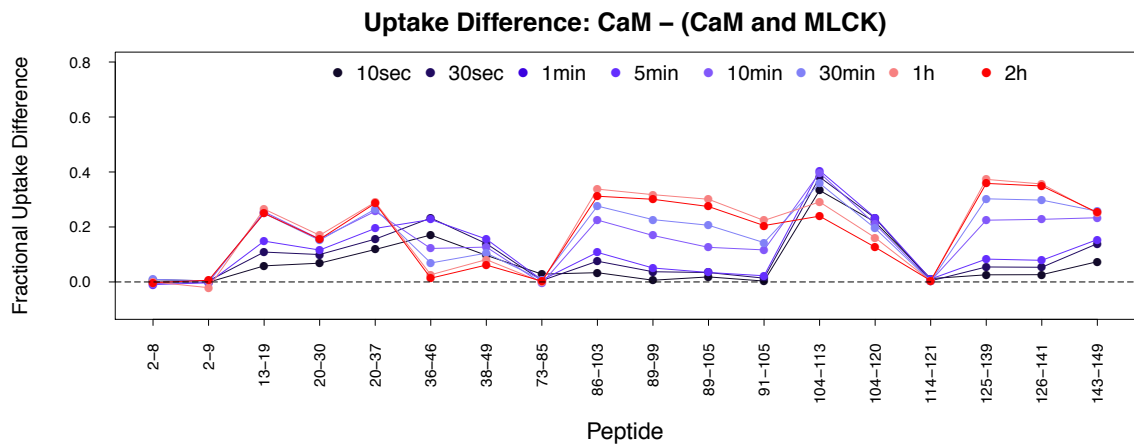

Supplement: pbio.2004486.s005.pdf [file pbio.2004486.s005.pdf]
