# Supplementary material for: Calmodulin fishing with a structurally disordered bait triggers CyaA catalysis
Source: PubMed Central journal article supplement (PMC5764468; doi:10.1371/journal.pbio.2004486), 2017-12-29
Supplement: pbio.2004486.s008.pdf [file pbio.2004486.s008.pdf]

## CyaA CATALYTIC DOMAIN

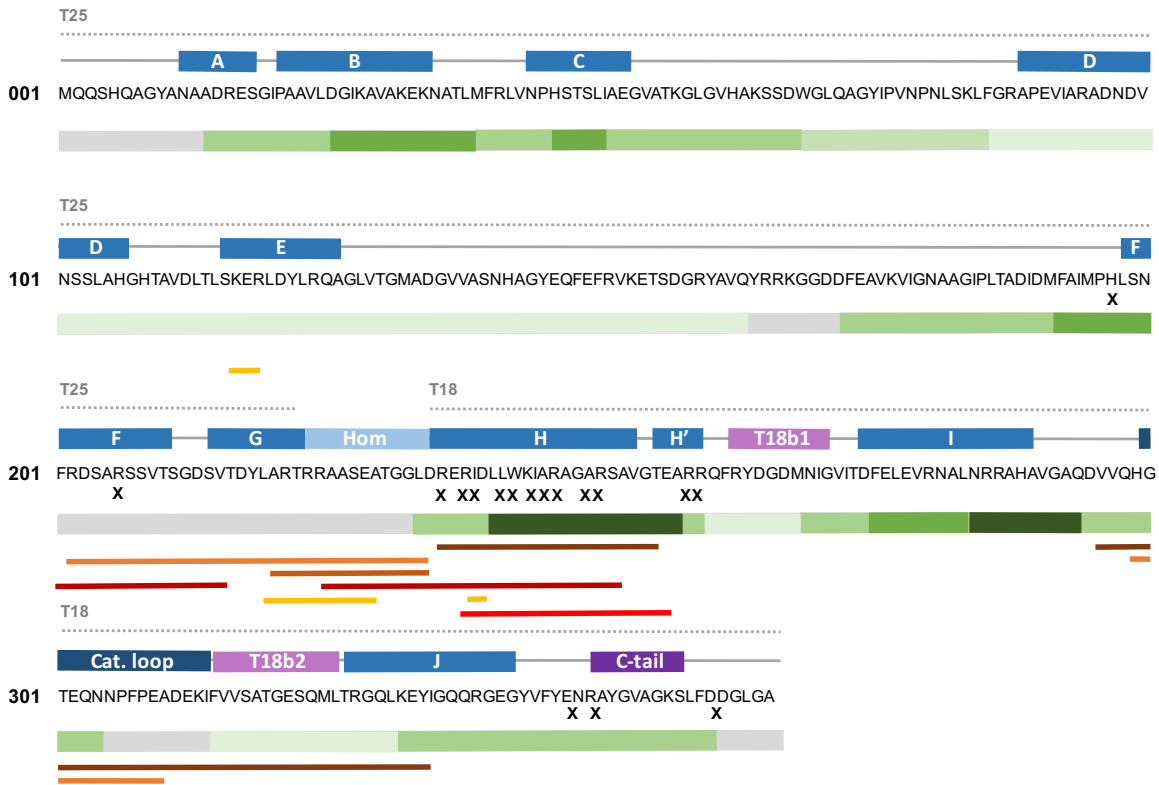

|                                                                            |                     |
|----------------------------------------------------------------------------|---------------------|
| <input checked="" type="checkbox"/> X-Ray Crystallography Interaction Site | PONDRL VL-XT        |
| Dynamic Events only                                                        | PONDRL VSL2         |
| Low Reduction in Solvent Accessibility only                                | PONDRL VL3-BA       |
| Dynamic Events with Low Reduction in Solvent Accessibility                 | PONDRL FIT          |
| High Reduction in Solvent Accessibility only                               | MoRFpred            |
| Dynamic Events with High Reduction in Solvent Accessibility                | CaM Target Database |
