# Supplementary material for: Calmodulin fishing with a structurally disordered bait triggers CyaA catalysis
Source: PubMed Central journal article supplement (PMC5764468; doi:10.1371/journal.pbio.2004486), 2017-12-29
Supplement: pbio.2004486.s009.pdf [file pbio.2004486.s009.pdf]

## CALMODULIN

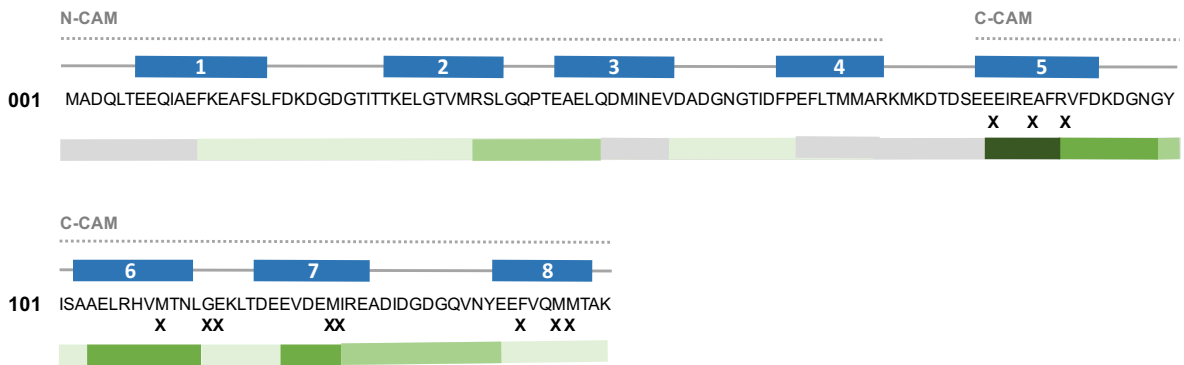

- X-Ray Crystallography Interaction Site
- Dynamic Events only
- Low Reduction in Solvent Accessibility only
- Dynamic Events with Low Reduction in Solvent Accessibility
- High Reduction in Solvent Accessibility only
- Dynamic Events with High Reduction in Solvent Accessibility
