# Supplementary material for: Calmodulin fishing with a structurally disordered bait triggers CyaA catalysis
Source: PubMed Central journal article supplement (PMC5764468; doi:10.1371/journal.pbio.2004486), 2017-12-29
Supplement: pbio.2004486.s013.pdf [file pbio.2004486.s013.pdf]

|                                                                          | CaM                                 | H-CaM                                  | P <sub>MLCK</sub> -CaM | AC364  | AC364-CaM |
|--------------------------------------------------------------------------|-------------------------------------|----------------------------------------|------------------------|--------|-----------|
| <b>Data collection parameters</b>                                        |                                     |                                        |                        |        |           |
| Instrument                                                               | Beamline SWING (synchrotron SOLEIL) |                                        |                        |        |           |
| Detector                                                                 | CCD-based AVIEX                     |                                        |                        |        |           |
| Beam geometry                                                            | 0.8 mm x 0.15 mm                    |                                        |                        |        |           |
| Wavelength [Å]                                                           | 1.0                                 |                                        |                        |        |           |
| q-range [Å <sup>-1</sup> ]                                               | 0.0064 < q < 0.50                   |                                        |                        |        |           |
| Exposure time [s]                                                        | 2                                   |                                        |                        |        |           |
| Temperature [K]                                                          | 288                                 |                                        |                        |        |           |
| <b>Structural parameters</b>                                             |                                     |                                        |                        |        |           |
| I(0) Guinier [cm <sup>-1</sup> ]                                         | 0.0317                              | 0.0159                                 | 0.0134                 | 0.0252 | 0.0381    |
| R <sub>g</sub> Guinier [Å] <sup>a</sup>                                  | 22.2                                | 21.9                                   | 17.4                   | 25.9   | 29.2      |
| I(0) p(r) [cm <sup>-1</sup> ]                                            | 0.0319                              | 0.0159                                 | 0.0134                 | 0.0252 | 0.0383    |
| R <sub>g</sub> p(r) [Å]                                                  | 22.7                                | 22.1                                   | 17.3                   | 26.2   | 29.7      |
| D <sub>Max</sub> [Å]                                                     | 78                                  | 75                                     | 52                     | 91     | 98        |
| <b>Molecular mass determination</b>                                      |                                     |                                        |                        |        |           |
| MM <sub>sequence</sub> [kDa] <sup>b</sup>                                | 16.8                                | 19.3 <sup>b1</sup> -21.7 <sup>b2</sup> | 19.0                   | 39.4   | 56.2      |
| Partial specific volume [cm <sup>3</sup> .g <sup>-1</sup> ] <sup>c</sup> | 0.7174                              | 0.7210                                 | 0.7191                 | 0.7233 | 0.7215    |
| Concentration [g.L <sup>-1</sup> ]                                       | ND*                                 | ND*                                    | ND*                    | 0.80   | 0.82      |
| MM <sub>I(0)/c</sub> [kDa]                                               | ND*                                 | ND*                                    | ND*                    | 38.6   | 56.3      |
| MM <sub>SAXS MoW</sub> [kDa] <sup>d</sup>                                | 17.9                                | 21.9                                   | 18.6                   | 41.9   | 58.3      |
| MM <sub>SAXS QR</sub> [kDa] <sup>e</sup>                                 | 16.8                                | 19.7                                   | 19.2                   | 40.2   | 54.3      |
| <b>Dammif/Dammin analysis</b>                                            |                                     |                                        |                        |        |           |
| Dammif Model number                                                      | 20                                  | 20                                     | 20                     |        |           |
| NSD                                                                      | 0.56                                | 0.53                                   | 0.46                   |        |           |
| c <sup>2</sup> (Dammin)                                                  | 1.56                                | 1.10                                   | 1.90                   |        |           |
