# Supplementary material for: Calmodulin fishing with a structurally disordered bait triggers CyaA catalysis
Source: PubMed Central journal article supplement (PMC5764468; doi:10.1371/journal.pbio.2004486), 2017-12-29
Supplement: pbio.2004486.s014.pdf [file pbio.2004486.s014.pdf]

| <b>Sample</b> | <b>SR-CD</b>                                    |
|---------------|-------------------------------------------------|
|               | <b>Helical Content, % <math>\pm</math> S.D.</b> |
| holo-AC alone | 27 $\pm$ 2                                      |
| holo-CaM      | 51 $\pm$ 3                                      |
| holo-AC:CaM   | 42 $\pm$ 3                                      |
| holo-H        | 19 $\pm$ 1                                      |
| holo-H:CaM    | 60 $\pm$ 5                                      |
