# Supplementary material for: Calmodulin fishing with a structurally disordered bait triggers CyaA catalysis
Source: PubMed Central journal article supplement (PMC5764468; doi:10.1371/journal.pbio.2004486), 2017-12-29
Supplement: pbio.2004486.s015.pdf [file pbio.2004486.s015.pdf]

| <b>Sample</b>     | <b>SR-CD</b>              |                 |
|-------------------|---------------------------|-----------------|
|                   | <b>Helical Content, %</b> | <b>Residues</b> |
| 1 AC              | 27                        | 98              |
| 2 CaM             | 51                        | 76              |
| 3 AC + CaM*       | 34                        | 174             |
| 4 AC: CaM complex | 42                        | 215             |
| Difference 4 - 3  | 8                         | 41              |

\* average of the two previous values weighted by the respective residue number.
