# Supplementary material for: Calmodulin fishing with a structurally disordered bait triggers CyaA catalysis
Source: PubMed Central journal article supplement (PMC5764468; doi:10.1371/journal.pbio.2004486), 2017-12-29
Supplement: pbio.2004486.s016.pdf [file pbio.2004486.s016.pdf]

| <b>Sample</b>                                            | <b>Helical Content,<br/>% <math>\pm</math> S.D.</b> | <b>Total no. of<br/>residues</b> | <b>No. of AA in<br/>helices</b> |
|----------------------------------------------------------|-----------------------------------------------------|----------------------------------|---------------------------------|
| CaM                                                      | 51 $\pm$ 3                                          | 148                              | 76                              |
| H-helix peptide                                          | 19 $\pm$ 1                                          | 22                               | 4                               |
| Sum of H:CaM<br>assuming no helical<br>structure changes | 47 $\pm$ 4                                          | 171                              | 80                              |
| H-helix:CaM                                              | 60 $\pm$ 5                                          | 171                              | 102                             |
