# Supplementary material for: Calmodulin fishing with a structurally disordered bait triggers CyaA catalysis
Source: PLoS Biol. 2017 Dec 29;15(12):e2004486. doi: 10.1371/journal.pbio.2004486 (PMC5764468; doi:10.1371/journal.pbio.2004486)
Supplement: S2 Data — (XLSX) [file pbio.2004486.s018.xlsx]

## Sheet: Feuil1
	Data for Supporting Figure S2. Far-UV Synchrotron Radiation Circular Dichroism spectra of isolated AC, CaM, H-helix peptide and their complexes.
		Mean Residual Ellipticity (*1000)
	Wavelength, nm	AC364:CaM	H:CaM	H-peptide	CaM	AC364
	181	-3.9995	-5.2656
	182	-3.0929	-4.3751
	183	-0.56956	-0.68499
	184	4.8708	5.8622
	185	10.294	14.851
	186	16.12	25.376
	187	21.14	33.744
	188	26.337	40.324
	189	29.812	45.027
	190	31.912	49.274	3.2136	35.864	12.07
	191	32.907	52.151	5.7837	40.572	13.959
	192	32.591	53.755	6.6197	43.197	14.893
	193	30.999	53.771	5.7217	43.739	14.871
	194	28.758	52.637	0.42214	41.535	13.287
	195	25.317	49.415	-1.9504	38.287	11.745
	196	21.61	44.416	-5.3042	33.672	9.6928
	197	17.674	38.209	-8.5313	27.737	7.5946
	198	13.186	30.802	-11.17	21.366	5.1271
	199	8.2216	22.369	-13.756	14.679	2.4808
	200	3.1799	13.619	-15.726	7.8153	-0.11873
	201	-1.9056	5.1756	-17.224	1.5685	-2.4986
	202	-6.3394	-2.3248	-17.934	-3.9569	-4.4939
	203	-10.034	-8.7051	-18.131	-8.5811	-6.16
	204	-13.044	-13.655	-18.032	-12.265	-7.6006
	205	-15.523	-17.715	-17.566	-15.112	-8.7562
	206	-17.589	-20.831	-16.909	-17.37	-9.6763
	207	-19.098	-23.135	-16.186	-18.965	-10.32
	208	-19.792	-24.386	-15.312	-19.879	-10.724
	209	-20.02	-25.045	-14.281	-19.971	-10.717
	210	-19.525	-24.679	-13.055	-19.501	-10.365
	211	-18.553	-23.941	-11.949	-18.8	-9.8366
	212	-17.645	-23.041	-11.272	-18.027	-9.3459
	213	-16.846	-22.635	-10.572	-17.681	-8.8729
	214	-16.211	-22.207	-10.03	-17.542	-8.5445
	215	-15.999	-22.307	-9.556	-17.552	-8.28
	216	-15.942	-22.719	-9.2924	-17.857	-8.1342
	217	-15.996	-23.363	-9.2944	-18.24	-8.0056
	218	-16.113	-24.011	-9.4112	-18.618	-7.9917
	219	-16.345	-24.904	-9.2529	-19.091	-7.9258
	220	-16.418	-25.399	-9.0787	-19.447	-7.8446
	221	-16.45	-25.846	-8.7242	-19.695	-7.7279
	222	-16.531	-26.13	-8.6563	-19.867	-7.5953
	223	-16.349	-26.04	-8.2183	-19.8	-7.4317
	224	-15.907	-25.586	-7.7968	-19.537	-7.2846
	225	-15.429	-24.988	-7.65	-18.94	-7.0195
	226	-14.789	-24.102	-7.3717	-18.199	-6.7121
	227	-14.079	-23.194	-7.122	-17.238	-6.2438
	228	-13.33	-21.974	-7.0274	-16.269	-5.7431
	229	-12.297	-20.402	-6.4034	-15.166	-5.2907
	230	-11.027	-18.447	-5.9648	-14.086	-4.8718
	231	-9.769	-16.281	-5.597	-12.642	-4.4147
	232	-8.521	-14.122	-4.7805	-11.03	-3.8217
	233	-7.6065	-12.395	-4.0331	-9.5065	-3.2776
	234	-6.6359	-10.626	-3.6677	-8.2021	-2.8356
	235	-5.6732	-9.1628	-3.0889	-6.8941	-2.5045
	236	-4.607	-7.5026	-2.9481	-5.8335	-2.2156
	237	-3.6941	-6.0578	-2.7284	-4.5809	-1.7981
	238	-2.8726	-4.7692	-2.331	-3.5546	-1.3509
	239	-2.4191	-3.8441	-1.8927	-2.9144	-1.0705
	240	-1.8439	-2.8491	-1.5596	-2.368	-0.80075
	241	-1.5323	-2.3317	-1.1992	-1.9435	-0.62068
	242	-1.3281	-1.93	-0.92245	-1.4538	-0.44721
	243	-1.2137	-1.8155	-1.0748	-0.88353	-0.22229
	244	-1.0408	-1.6388	-1.027	-0.57055	-0.17216
	245	-0.89211	-1.306	-1.0501	-0.44358	-0.18535
	246	-0.61145	-0.7216	-0.92014	-0.42742	-0.21437
	247	-0.45315	-0.34761	-0.84923	-0.29979	-0.079812
	248	-0.35091	-0.14907	-0.33079	-0.085088	0.036938
	249	-0.33211	-0.27274	0.012203	0.060024	0.16292
	250	-0.28198	-0.39312	0.34761	0.13159	0.16292
